# Supplementary material for: Graphene-Oxide-Based Electrochemical Sensors for the Sensitive Detection of Pharmaceutical Drug Naproxen
Source: PubMed Central journal article supplement (PMC7085571; doi:10.3390/s20051252), 2020-02-25
Supplement: sensors-20-01252-s001.pdf [file sensors-20-01252-s001.pdf]

## Supplementary Materials

# Graphene-Oxide-Based Electrochemical Sensors for the Sensitive Detection of Pharmaceutical Drug Naproxen

Lanting Qian, Antony Raj Thiruppathi, Reem Elmahdy, Joshua van der Zalm and Aicheng Chen\*

Electrochemical Technology Centre, Department of Chemistry, University of Guelph, 50 Stone Road East, Guelph, Ontario N1G 2W1, Canada; qianl@uoguelph.ca; athirupp@uoguelph.ca; relmahdy@uoguelph.ca; vanderzj@uoguelph.ca

\* Correspondence: aicheng@uoguelph.ca ;Tel.: 1-519-8244120 Ext. 54764; Fax: 1-519-7661499;

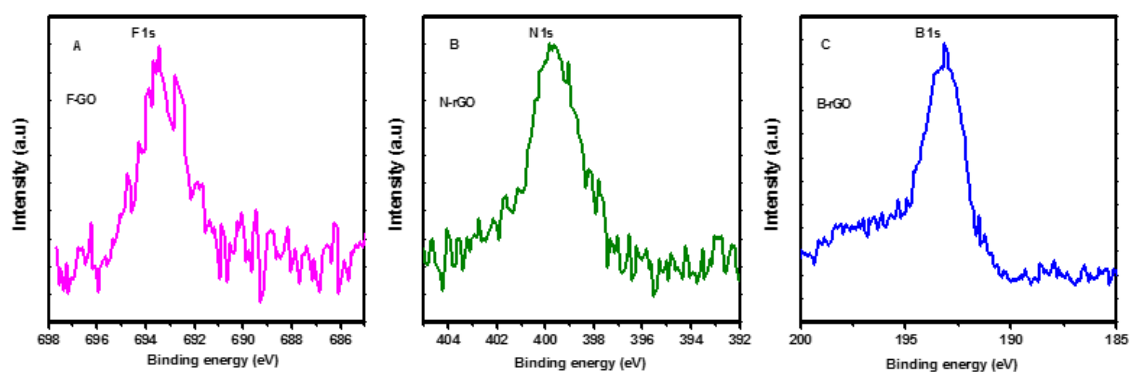

**Figure S1.** High-resolution XPS spectra of: (A) F1s peak of fluorinated graphene oxide at 692.675; (B) N1s peak of nitrogen doped reduced graphene oxide at 400.137 eV; and (C) B1s peak of boron doped reduced graphene oxide at 197.455 eV.

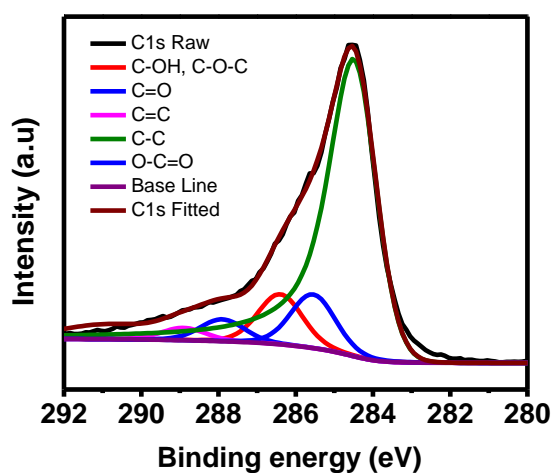

**Figure S2.** High-resolution C1s spectrum with the deconvoluted peaks for N-rGO.

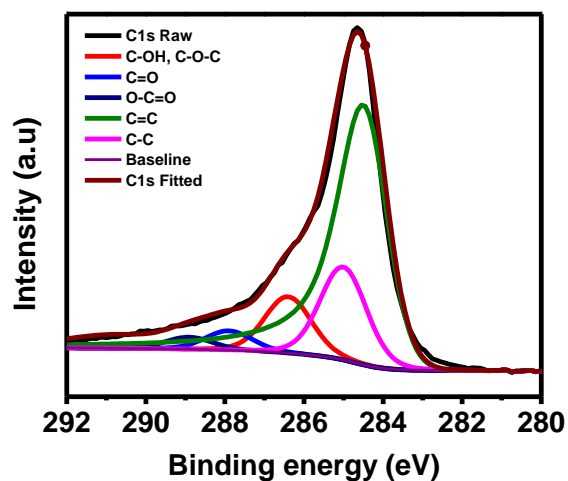

Figure S3. High-resolution C1s spectrum with the deconvoluted peaks for B-rGO.

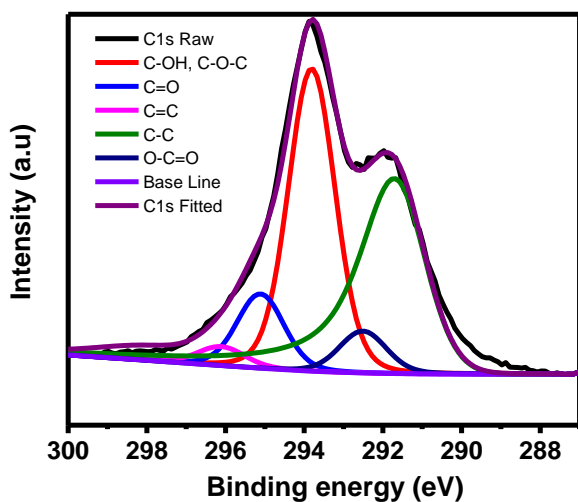

Figure S4. High-resolution C1s spectrum with the deconvoluted peaks for F-GO.

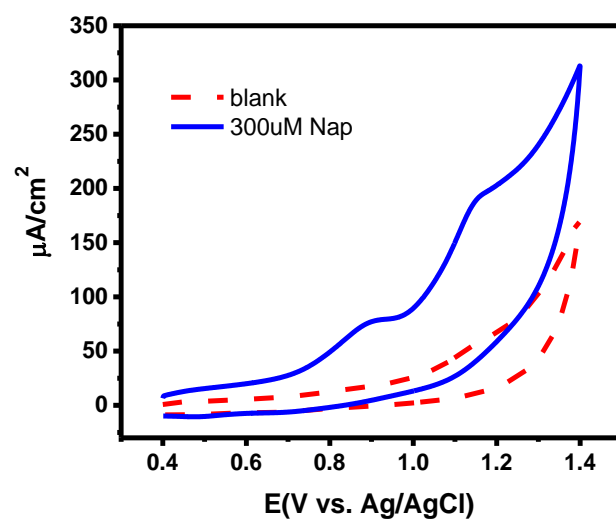

**Figure S5.** CV curves of GO/GCE recorded at a scan rate of 50 mV/s in 0.1M PBS (pH 7.2) buffer in the absence of (dashed line) and in the presence of 300 μM Naproxen (solid line).

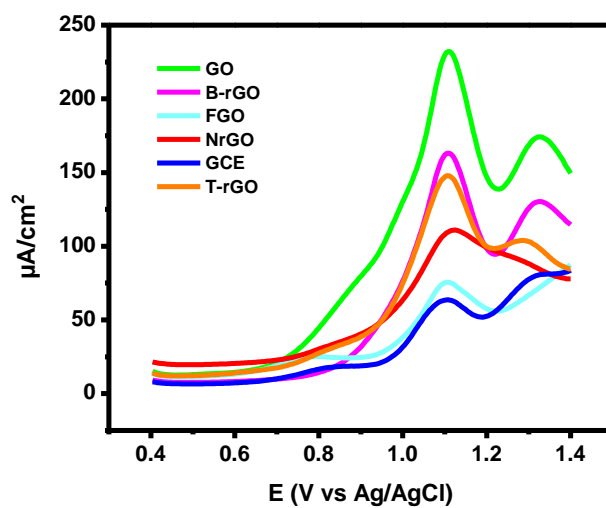

**Figure S6.** DPV curves of the various electrodes recorded in 0.1M PBS (pH 7.2) containing 300 μM.
